# Supplementary material for: Pan-Resistome Insights into the Multidrug Resistance of Acinetobacter baumannii
Source: MDPI journal article supplement (doi:10.3390/antibiotics10050596), 2021-05-18
Supplement: s1 [file s1]

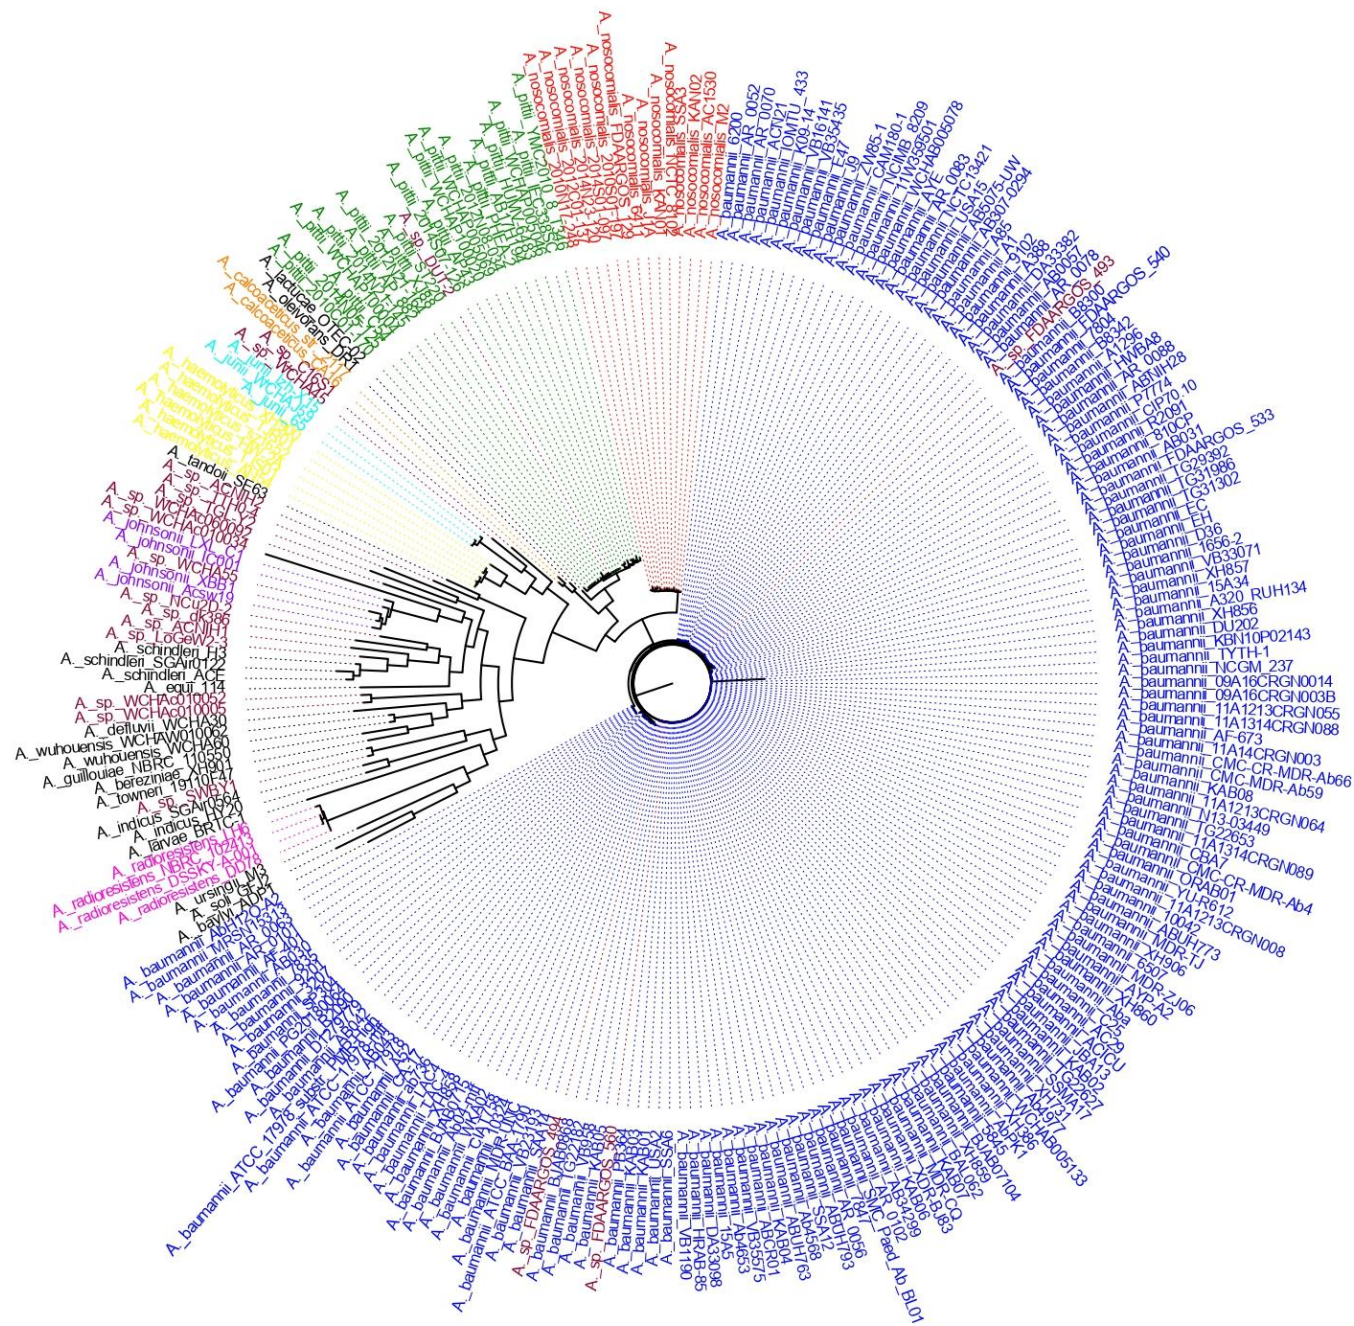

- *Acinetobacter baumannii*
- *Acinetobacter nosocomialis*
- *Acinetobacter pittii*
- *Acinetobacter calcoaceticus*
- *Acinetobacter junii*
- *Acinetobacter haemolyticus*
- *Acinetobacter johnsonii*
- *Acinetobacter radioresistens*
- *Acinetobacter sp.*
- Other species
